# Supplementary material for: A Statistical Analysis on Recovery Cases of Covid19 in India
Source: Preprints.org preprint supplement (doi:10.20944/preprints202011.0284.v1), 2020-11-09

SUPPLIMENTARY DATASET

**______________________________________________________________________________**

The dataset is converted in terms of Number of Recovered Covid-cases with respect to Sept,7 to Oct ,25 -2020.

| 7 | 4995 |
| --- | --- |
| 14 | 50300 |
| 21 | 39174 |
| 28 | 64906 |
| 35 | 66158 |
| 42 | 67855 |

Data Analysis report – **Curve Expert 1.4**

*
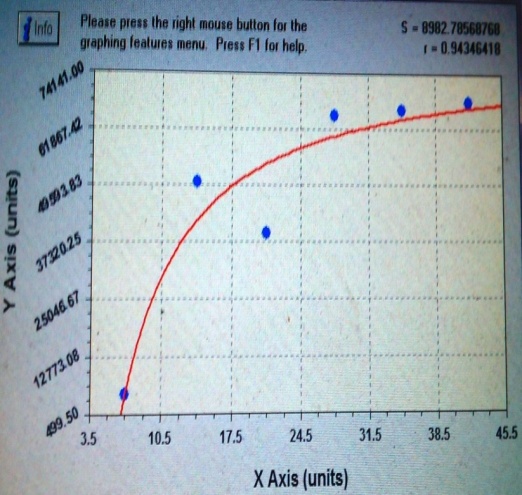
*
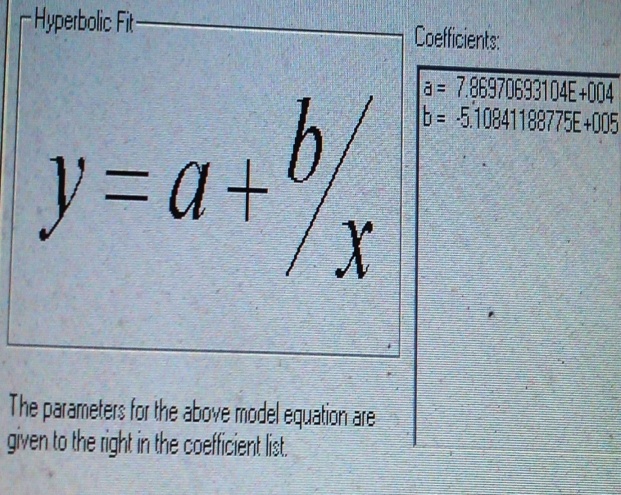


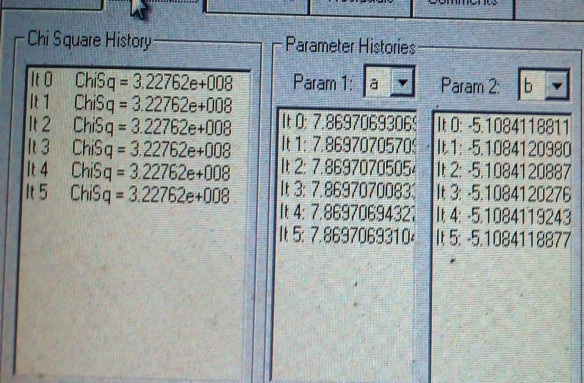

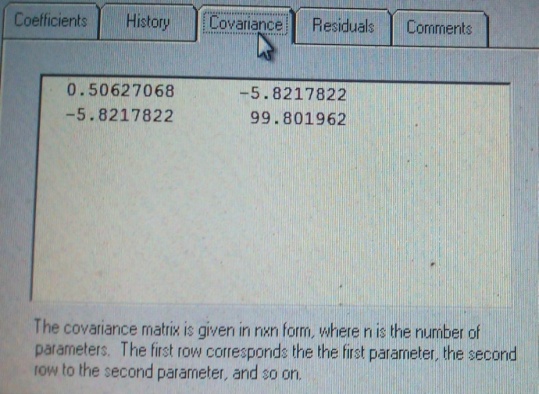


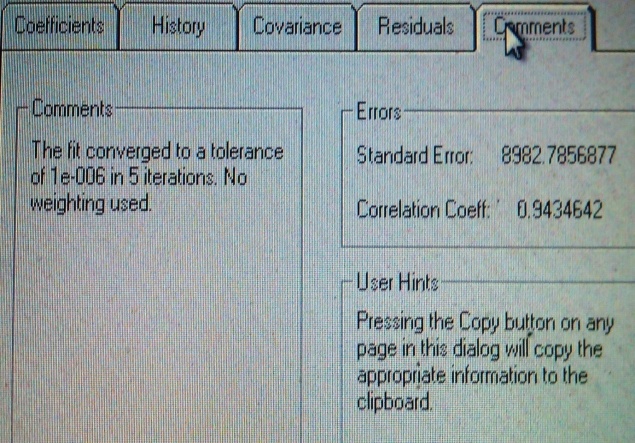

Supplement: Supplementary file 3 [file supplementary]
